# Supplementary material for: Stem cell niche exit in C. elegans via orientation and segregation of daughter cells by a cryptic cell outside the niche
Source: eLife. 2020 Jul 21;9:e56383. doi: 10.7554/eLife.56383 (PMC7467730; doi:10.7554/eLife.56383)
Supplement: Figure 3—source data 1. [file elife-56383-fig3-data1.xlsx]

## Sheet: Sheet1
Folder	File	DTC	DTC+Sh1	Sh1	Neither
3colorDTC19	1row_1	13	9	53	0
	1row_5	14	8	63	0
	1row_6	12	12	45	0
	1row_7	8	10	43	0
	1row_9	7	11	49	0
	1row_10	9	9	37	0
	early2row_1	8	7	42	0
	2row_1	11	15	33	0
	2row_2	16	15	16	4
	fewemb_2	7	3	64	0
	fewemb_4	14	5	34	0
	fewemb_5	6	9	24	0
	1row_3	16	2	25	9
	1row_4	17	3	28	6
4tissue timelapses_nov	1130_pos3_adult	11	5	41	0
	1130_pos7_matsperm	26	12	70	0
	1130_pos14_adult	24	14	62	0
051818_4tissue_TL	0518worm2elabdtc	25	6	23	21	sole dramaric outlier
052118_4tissue_TL	0521pos0elabdtc	30	12	34	0
	0521pos2adult	27	16	47	0
	0521pos1_6adult	21	10	24	0
	0521pos19adult	8	19	32	0
052518_4tissue_TL	05255_6elabdtc	31	19	42	0
052818_4tissue_TL	0528set0elabdtc	15	7	73	0
	0528 set3 adult	33	7	57	0	TOTAL GC
	0528set2pos0matsperm528	39	10	39	0	1843
		DTC	DTC+Sh1	Sh1	Neither
	sum	448	255	1100	40
	av	17.2308	9.80769	42.3077	1.53846
