# Supplementary material for: Stem cell niche exit in C. elegans via orientation and segregation of daughter cells by a cryptic cell outside the niche
Source: eLife. 2020 Jul 21;9:e56383. doi: 10.7554/eLife.56383 (PMC7467730; doi:10.7554/eLife.56383)
Supplement: Figure 3—source data 2. [file elife-56383-fig3-data2.xlsx]

## Sheet: Sheet1
File	Folder	Position	Distance			DTC	DTC+Sh1	Sh1
032118_4colorhets	2row_7	DTC	4.27		0-9.99	5	2	0
032018_4tissuehets	1row_2	DTC	4.95		10-19.99	5	4	1
030518_lag2BFP_nasi2_inx8_FT564	_5 and_4	DTC	5.53		20-29.99	7	7	1
032018_4tissuehets	matsperm_4	DTC	7.81		30-39.99	8	6	5
113018_4tissue_TL	Pos14	DTC	9.26		40-49.99	0	10	6
113018_4tissue_TL	Pos7	DTC	10.2		50-59.99	0	0	4
032018_4tissuehets	matsperm_3	DTC	13.83		60-69.99	0	0	8
032018_4tissuehets	_1	DTC	14.27		70-79.99	0	0	3
032118_4colorhets	1row_3	DTC	14.4			25	29	28	82
052118_4tissue_TL	1_6bound	DTC	15.44
032018_4tissuehets	matsperm_4	DTC	20.25
052818_4tissue_TL	set3	DTC	24.42		TOTAL CELLS
030818_4tissuehets	1row_3	DTC	24.92		DTC	DTC+Sh1	Sh1	Neither	TOTAL GC
032018_4tissuehets	2row_10	DTC	25.05		448	255	1100	40	1843
030818_4tissuehets	1row_2	DTC	25.55
052818_4tissue_TL	set2pos0	DTC	27.02
052818_4tissue_TL	concat8910	DTC	29.69
030818_4tissuehets	1row_5	DTC	31.43			DTC	DTC+Sh1	Sh1
032018_4tissuehets	firstov_1	DTC	33.41		Relative proportions	1.25422	2.55605	0.572106
030818_4tissuehets	2row_3	DTC	36.15		cells	0.243082	0.138361	0.596853
031318_4tissuehets	fewemb1	DTC	36.18		divs	0.304878	0.353659	0.341463
030818_4tissuehets	1row_2	DTC	37.48
031318_4tissuehets	fewemb_3	DTC	37.98
032018_4tissuehets	2row_4	DTC	38.15
030518_lag2BFP_nasi2_inx8_FT564	_10	DTC	38.24
052118_4tissue_TL	19_pos2	DTC-Sh1	7.8
052118_4tissue_TL	19_pos2	DTC-Sh1	9.57
113018_4tissue_TL	Pos3	DTC-Sh1	17.22
030818_4tissuehets	1row_5	DTC-Sh1	18.25
052118_4tissue_TL	1_6bound	DTC-Sh1	19.63
030818_4tissuehets	2row_3	DTC-Sh1	19.65
052818_4tissue_TL	Set0	DTC-Sh1	20.46
113018_4tissue_TL	Pos14	DTC-Sh1	20.63
113018_4tissue_TL	Pos3	DTC-Sh1	22.1
032118_4colorhets	1row_3	DTC-Sh1	22.11
113018_4tissue_TL	Pos3	DTC-Sh1	23.08
032018_4tissuehets	2row_4	DTC-Sh1	25.43
113018_4tissue_TL	Pos14	DTC-Sh1	25.93
052518_4tissue_TL	56_pos1	DTC-Sh1	30.36
052118_4tissue_TL	pos0timelapse	DTC-Sh1	33.57
032118_4colorhets	2row_4	DTC-Sh1	34.63
030518_lag2BFP_nasi2_inx8_FT564	YA_9 (and YA_3-8)	DTC-Sh1	37.89
032118_4colorhets	2row_4	DTC-Sh1	38.3
051818_4tissue_TL	worm2concat	DTC-Sh1	39.12
032118_4colorhets	1row_3	DTC-Sh1	40.61
031318_4tissuehets	fewemb1	DTC-Sh1	41.13
032018_4tissuehets	2row_1	DTC-Sh1	42.7
052118_4tissue_TL	19_pos2	DTC-Sh1	43.7
032118_4colorhets	1row_3	DTC-Sh1	43.71
032018_4tissuehets	2row_4	DTC-Sh1	44.24
032018_4tissuehets	matsperm_3	DTC-Sh1	45.51
032018_4tissuehets	2row_1	DTC-Sh1	45.64
031318_4tissuehets	firstov_2	DTC-Sh1	47.62
032118_4colorhets	2row_4	DTC-Sh1	47.63
030518_lag2BFP_nasi2_inx8_FT564	_5 and_4	Sh1	19.5
030518_lag2BFP_nasi2_inx8_FT564	_5 and _4	Sh1	21.88
031318_4tissuehets	2row_2	Sh1	31.59
052818_4tissue_TL	concat8910	Sh1	33.19
052118_4tissue_TL	pos2concat	Sh1	38.48
052818_4tissue_TL	concat8910	Sh1	39.34
032118_4colorhets	1_embryo_1	Sh1	39.76
032118_4colorhets	1row_4	Sh1	41.4
031318_4tissuehets	oocytes_1	sh1	42.85
032118_4colorhets	1_embryo_1	Sh1	46.08
030518_lag2BFP_nasi2_inx8_FT564	YA_9 (and YA_3-8)	Sh1	47.02
031318_4tissuehets	oocytes_1	sh1	47.45
113018_4tissue_TL	Pos7	Sh1	48.23
030518_lag2BFP_nasi2_inx8_FT564	YA_1	Sh1	51.96
113018_4tissue_TL	Pos7	Sh1	54.74
030518_lag2BFP_nasi2_inx8_FT564	YA_9 (and YA_3-8)	Sh1	55.15
031318_4tissuehets	fewemb1	Sh1	59.01
032118_4colorhets	1_embryo_1	Sh1	61.07
032118_4colorhets	1row_3	Sh1	61.43
030518_lag2BFP_nasi2_inx8_FT564	_9	Sh1	62.67
052818_4tissue_TL	set2pos0	Sh1	63.49
032018_4tissuehets	1row_2	Sh1	64.22
030518_lag2BFP_nasi2_inx8_FT564	YA_9 (and YA_3-8)	Sh1	65.92
052818_4tissue_TL	set2pos0	Sh1	67.91
113018_4tissue_TL	Pos7	Sh1	68.01
113018_4tissue_TL	Pos7	Sh1	73.78
031318_4tissuehets	_1	Sh1	74.31
113018_4tissue_TL	Pos7	Sh1	75.12
