# Supplementary material for: Stem cell niche exit in C. elegans via orientation and segregation of daughter cells by a cryptic cell outside the niche
Source: eLife. 2020 Jul 21;9:e56383. doi: 10.7554/eLife.56383 (PMC7467730; doi:10.7554/eLife.56383)
Supplement: Figure 3—source data 3. [file elife-56383-fig3-data3.xlsx]

## Sheet: Sheet1
Folder	File	Mitosis	Position	DTC	DTC+Sh1	Sh1	Neither
113018_4tissue_TL	Pos3	M	DTC-Sh1	11	5	41	0
		M	DTC-Sh1
		M	DTC-Sh1
	Pos7	A	Sh1	26	12	70	0
		M	Sh1
		M	Sh1
		M	Sh1
		M	DTC plex
		M	Sh1
	Pos14	A	DTC-Sh1	24	14	62	0
		A	DTC plex
		M	DTC-Sh1
052118_4tissue_TL	pos0timelapse	M	DTC-Sh1	30	12	34	0
	pos2concat	A	Sh1	27	16	47	0
	1_6bound	M	DTC-Sh1	21	10	24	0
		M	DTC
	19_pos2	A	DTC-Sh1	8	19	32	0
		A	DTC-Sh1
		A	DTC-Sh1
052818_4tissue_TL	set2pos0	A	Sh1	39	10	39	0
		M	Sh1
		M	DTC deep
040818_4tissuesTL	concatpos0	top, A	DTC plex	17	7	42	0
		bottom, M	DTC-Sh1	20	9	13	0
		bottom, M	DTC plex
					DTC	DTC+Sh1	Sh1	Neither	Total
			25 div total	cells	223	114	404	0	741
				div	6	11	8	0	25
				Relative prop	0.797489	2.86	0.586931
				%cells	0.300945	0.153846	0.545209	0
				%divs	0.24	0.44	0.32
