# Supplementary material for: Stem cell niche exit in C. elegans via orientation and segregation of daughter cells by a cryptic cell outside the niche
Source: eLife. 2020 Jul 21;9:e56383. doi: 10.7554/eLife.56383 (PMC7467730; doi:10.7554/eLife.56383)
Supplement: Figure 5—source data 1. [file elife-56383-fig5-data1.xlsx]

## Sheet: Sheet1
Folder	File	Stage	all DTC has sygl-1?	region of overlap?	dividing cells
031518_sygl1gfp_oma1gfp_lag2mKate_inx8	1row1	adult	yes	interface
	1row2	adult	no (not long projections)	interface
	1row3	adult	yes	interface	1 interface
	1row4	adult	yes	interface	1 interface
	1row5	adult	no (not long projections)	interface
	2ow1	adult	no (not long projections)	interface
	2ow2	adult	no (not long projections)	interface	2 interface
	2ow3	adult	no (not long projections)	interface	1 interface
082217_inx8_sygl1	4	adult	no (not long projections)	interface	1inter?sh1?
these are taken at 40x	5	adult	no (not long deep projections)	interface
	6	adult	no (not long projections)	interface
	7	adult	yes	interface	interface, 2 dtc
	8	adult	yes	interface
	9	adult	yes	6 gcd
	11	adult	yes plex, with some assoc to long proc	interface
	13	adult	yes	interface
090117_sygl1gfp_inx8Mkate_100x	1	adult	yes	interface
	2	adult	no (faint)	none
	3	adult	no	interface	2dtc 1 interface
	4	adult	yes	interface	1 interface
	5	adult	no (not peak sygl)	interface
	8	adult	yes plex	asym nice boundary
	9	adult	no (not long deep projections)	only at interface
	10	adult	no (not long projections)	only at interface	1 deep dtc
	12	adult	yes plex	only at interface
	13	adult	no (not long deep projections)	only at interface	1 interface
	14	adult	no (faint sygl distal only)	none	1 distal
	15	adult	no (faint sygl, long proc don't)	interface	1 interface, 1 distal
	16	adult	no, distal only	none
102419_sygls	4	adult	no, distal only	interface
L4 picked + 24 hrs	6	adult	no, distal only	interface
	7	adult	no, distal only	none
	11	adult	no, distal only	none	1 dtc
	17	adult	no, distal only	interface
	29	adult	no, distal only	interface
	30	adult	yes	interface	dtc
