# Supplementary material for: Stem cell niche exit in C. elegans via orientation and segregation of daughter cells by a cryptic cell outside the niche
Source: eLife. 2020 Jul 21;9:e56383. doi: 10.7554/eLife.56383 (PMC7467730; doi:10.7554/eLife.56383)
Supplement: Figure 5—source data 2. [file elife-56383-fig5-data2.xlsx]

## Sheet: Sheet1
Folder	File	DTC distance	Sh1 Distance	gld Distance
112619_lag2mNG_inx8mK_gld1GFP	2row_1	58.39	14.23	29.33
	fewemb_1	32.79	16.8	28.25		picked L4 24 hrs before imaging
	2row_3	37.7	14.36	37.16		scoring: turn off red
	2row_2	59.18	17.61	22.53		reset green
	1row_6	29.14	15.15	22.29		adust to see distalmost perinuclear speckles esp in superficial slice or zproj
	1row_7	59.99	34.1	42.41		mark distal gld and DTC
	1row_4	67.87	29.2	40.38		turn on red
	1row_3	66.61	40.06	41.1
	fewemb_3	33.88	13.06	38.43
	1row_1	60.06	17.46	44.13
	1row_10	62.46	33.24	45.1
	1row_5	73.32	32.21	42.83
	1row_9	43.07	31.47	46.65
	1row_11	65.58	29.03	55.14
	fewemb_2	30.45	15.27	42.53
120319_lag2mNG_inx8mK_gld1GFP	fewemb_2	72.67	49.44	52.76
	2row_5	61.53	10.29	30.7
	2row_6	80.85	26.89	30.99
	2row_2	61.4	25.79	40.82
	2row_3	55.1	19.1	36.52
	2row_4	79.05	23.31	30.22
	1row_7	41.87	15.93	32.37
	1row_8	66.08	35.08	36.74
	2row_1	69.11	46.16	50.27
	1row_4	69.5	42.27	46.84
	1row_5	72.02	54.93	57.58
	1row_6	43.04	9.62	20.3
	1row_10	67.89	35.02	44.59
	1row_2	28.72	6.78	23.39
	1row_3	53.73	31.99	39.67
	1row_1	61.25	33.72	54.62
