# Supplementary material for: Stem cell niche exit in C. elegans via orientation and segregation of daughter cells by a cryptic cell outside the niche
Source: eLife. 2020 Jul 21;9:e56383. doi: 10.7554/eLife.56383 (PMC7467730; doi:10.7554/eLife.56383)
Supplement: Figure 6—source data 1. [file elife-56383-fig6-data1.xlsx]

## Sheet: Sheet1
Folder	File	Position	angle to gonad	angle to DTC-Sh1
100318_tubulin_nasi_8_DTCbfp	pos8concat	DTC	3.09
101018_tubulin_inx8_nasi2_bfpdtc	Pos6Concat	DTC	4.11
100318_tubulin_nasi_8_DTCbfp	pos7concat	DTC	7.34
102418_tub_inx8_nasi2_bfp	2pseudo	DTC	10.16
100318_tubulin_nasi_8_DTCbfp	pos7concat	DTC	11.39
101018_tubulin_inx8_nasi2_bfpdtc	Pos1	DTC	18.48
101118_tubulin_inx8_nasi_bfpdtc	Pos0Concat	DTC	22.29
111218_tub_inx8_nasi2_bfp_TL	Pos6Concat	DTC	22.51
111218_tub_inx8_nasi2_bfp_TL	Pos6Concat	DTC	28.71
101118_tubulin_inx8_nasi_bfpdtc	Pos4Concat	DTC	28.89
101118_tubulin_inx8_nasi_bfpdtc	Pos0Concat	DTC	32.71
100318_tubulin_nasi_8_DTCbfp	pos4concat	DTC	33.2
102318_tubulin8nasiBFP	Pos0	DTC	36.55
092818_bfp_TUB_nasi_inx8	12_pos1	DTC	37.39
101118_tubulin_inx8_nasi_bfpdtc	pos3Concat	DTC	37.55
101018_tubulin_inx8_nasi2_bfpdtc	Pos1	DTC	38.23
101018_tubulin_inx8_nasi2_bfpdtc	Pos0	DTC	38.25
110818_tub_nasi_8_bfp_TL	Pos6Concat	DTC	41.26
092818_bfp_TUB_nasi_inx8	11_Pos1	DTC	47.95
101018_tubulin_inx8_nasi2_bfpdtc	Pos6Concat	DTC	49.21
092818_bfp_TUB_nasi_inx8	12_pos1	DTC	49.4
101118_tubulin_inx8_nasi_bfpdtc	Pos0Concat	DTC	54.83
101118_tubulin_inx8_nasi_bfpdtc	pos3Concat	DTC	55.76
101018_tubulin_inx8_nasi2_bfpdtc	Pos0	DTC	59
111218_tub_inx8_nasi2_bfp_TL	Pos6Concat	DTC	66.93
100318_tubulin_nasi_8_DTCbfp	pos4concat	DTC	71.62
092818_bfp_TUB_nasi_inx8	Pos3_12_13	DTC	75.38
101018_tubulin_inx8_nasi2_bfpdtc	Pos1	DTC	77.34
102318_tubulin8nasiBFP	Pos2	DTC-Sh1	1.07	8.35
101018_tubulin_inx8_nasi2_bfpdtc	Pos1	DTC-Sh1	11.4	13
102418_tub_inx8_nasi2_bfp	6pseudo	DTC-Sh1	13.5	12.2
101118_tubulin_inx8_nasi_bfpdtc	pos3Concat	DTC-Sh1	16.96	5.18
101018_tubulin_inx8_nasi2_bfpdtc	Pos5Concat	DTC-Sh1	18.36	47.49
110818_tub_nasi_8_bfp_TL	Pos2Concat	DTC-Sh1	18.47	13.7
102318_tubulin8nasiBFP	Pos2	DTC-Sh1	20.95	33.91
101918_tub_nasi_inx8_bfp	YA_fewemb_1+post5and10	DTC-Sh1	21.96	4.37
102418_tub_inx8_nasi2_bfp	6pseudo	DTC-Sh1	22.57	7.11
111218_tub_inx8_nasi2_bfp_TL	Pos6Concat	DTC-Sh1	23.52	13.05
102418_tub_inx8_nasi2_bfp	2pseudo	DTC-Sh1	23.92	17.78
100318_tubulin_nasi_8_DTCbfp	pos8concat	DTC-Sh1	24.78	20.62
101018_tubulin_inx8_nasi2_bfpdtc	Pos0	DTC-Sh1	28.11	23.42
100118_bfp_TUB_nasi_inx8	Pos2	DTC-Sh1	28.65	9.25
110818_tub_nasi_8_bfp_TL	Pos6Concat	DTC-Sh1	31.11	17.6
100318_tubulin_nasi_8_DTCbfp	pos8concat	DTC-Sh1	33.86	26.51
102418_tub_inx8_nasi2_bfp	15_16concat	DTC-Sh1	37.1	16.65
110818_tub_nasi_8_bfp_TL	Pos6Concat	DTC-Sh1	40.46	23.54
092818_bfp_TUB_nasi_inx8	Pos3_12_13	DTC-Sh1	45.31	25.15
102318_tubulin8nasiBFP	Pos5	DTC-Sh1	58.16	9.71
110818_tub_nasi_8_bfp_TL	Pos6Concat	DTC-Sh1	60.92	1.35
100318_tubulin_nasi_8_DTCbfp	pos7concat	DTC-Sh1	62.2	54.44
102318_tubulin8nasiBFP	Pos0	DTC-Sh1	63.11	3.16
110818_tub_nasi_8_bfp_TL	Pos6Concat	DTC-Sh1	65.15	10.32
100318_tubulin_nasi_8_DTCbfp	Pos0Concat	DTC-Sh1	69.45	21.62
092818_bfp_TUB_nasi_inx8	Pos3_12_13	DTC-Sh1	75.96	9.98
110818_tub_nasi_8_bfp_TL	Pos6Concat	DTC-Sh1	76.98	0.19
101918_tub_nasi_inx8_bfp	YA_fewemb_1+post5and10	DTC-Sh1	84.65	4.76
101918_tub_nasi_inx8_bfp	YA_fewemb_1+post5and10	DTC-Sh1	88.6	0.11
101118_tubulin_inx8_nasi_bfpdtc	Pos5Concat	Sh1	0.49
110818_tub_nasi_8_bfp_TL	Pos6Concat	Sh1	3.93
100118_bfp_TUB_nasi_inx8	Pos2	Sh1	6.42
101118_tubulin_inx8_nasi_bfpdtc	pos3Concat	Sh1	9.83
110818_tub_nasi_8_bfp_TL	Pos6Concat	Sh1	10.79
101018_tubulin_inx8_nasi2_bfpdtc	Pos0	Sh1	16.8
102418_tub_inx8_nasi2_bfp	15_16concat	Sh1	21.31
102318_tubulin8nasiBFP	Pos2	Sh1	21.47
092818_bfp_TUB_nasi_inx8	12_Pos4	Sh1	25.83
101118_tubulin_inx8_nasi_bfpdtc	pos3Concat	Sh1	27.03
100118_bfp_TUB_nasi_inx8	Pos4Concat	Sh1	27.71
110818_tub_nasi_8_bfp_TL	Pos6Concat	Sh1	28.96
100118_bfp_TUB_nasi_inx8	Pos2	Sh1	29.92
102418_tub_inx8_nasi2_bfp	15_16concat	Sh1	32.3
101918_tub_nasi_inx8_bfp	YA_fewemb_1+post5and10	Sh1	34.03
101018_tubulin_inx8_nasi2_bfpdtc	Pos0	Sh1	34.69
102318_tubulin8nasiBFP	Pos4	Sh1	39.6
111218_tub_inx8_nasi2_bfp_TL	Pos6Concat	Sh1	40.43
101018_tubulin_inx8_nasi2_bfpdtc	Pos5Concat	Sh1	43.28
100118_bfp_TUB_nasi_inx8	Pos2	Sh1	44.35
102318_tubulin8nasiBFP	Pos4	Sh1	45.09
100118_bfp_TUB_nasi_inx8	Pos5Concat	Sh1	46.05
101118_tubulin_inx8_nasi_bfpdtc	pos3Concat	sh1	48
102318_tubulin8nasiBFP	Pos5	Sh1	51.37
102418_tub_inx8_nasi2_bfp	2pseudo	Sh1	53.99
100318_tubulin_nasi_8_DTCbfp	pos4concat	Sh1	56.37
110818_tub_nasi_8_bfp_TL	Pos6Concat	Sh1	61.04
101018_tubulin_inx8_nasi2_bfpdtc	Pos0	Sh1	69.16
102318_tubulin8nasiBFP	Pos0	Sh1	71.1
102318_tubulin8nasiBFP	Pos4	Sh1	72.3
102318_tubulin8nasiBFP	Pos4	Sh1	72.96
102418_tub_inx8_nasi2_bfp	6pseudo	Sh1	78.31
100318_tubulin_nasi_8_DTCbfp	Pos0Concat	Sh1	78.33
110818_tub_nasi_8_bfp_TL	Pos6Concat	Sh1	78.58
102318_tubulin8nasiBFP	Pos2	Sh1	79.55
110818_tub_nasi_8_bfp_TL	Pos6Concat	Sh1	85.21
102318_tubulin8nasiBFP	Pos4	Sh1	85.34
101018_tubulin_inx8_nasi2_bfpdtc	Pos0	Sh1	86.23
101118_tubulin_inx8_nasi_bfpdtc	pos3Concat	sh1	86.76
102318_tubulin8nasiBFP	Pos4	Sh1	89.86
