# Supplementary material for: Stem cell niche exit in C. elegans via orientation and segregation of daughter cells by a cryptic cell outside the niche
Source: eLife. 2020 Jul 21;9:e56383. doi: 10.7554/eLife.56383 (PMC7467730; doi:10.7554/eLife.56383)
Supplement: Figure 7—figure supplement 1—source data 1. [file elife-56383-fig7-figsupp1-data1.xlsx]

## Sheet: Sheet1
Treatment	Sh1 boundary	Transition Zone	Difference
L4440CONTROL_1	48.55	62.16	13.61
L4440CONTROL_4	20.28	84.9	64.62
L4440CONTROL_5	15	87.24	72.24
L4440CONTROL_6	22.48	55.5	33.02
L4440CONTROL_7	32.9	73.33	40.43
L4440CONTROL_8	44.22	52.53	8.31
L4440CONTROL_9	40.05	54.32	14.27
L4440CONTROL_10	56.33	44.23	-12.1
L4440CONTROL_11	49.79	41.29	-8.5
L4440CONTROL_12	28.27	56.04	27.77
unc-60RNAI_1	56.82	52.9	-3.92
unc-60RNAI_2	59.65	53.04	-6.61
unc-60RNAI_3	43.32	40.48	-2.84
unc-60RNAI_4	36.2	77.98	41.78
unc-60RNAI_5	38.48	45.06	6.58
unc-60RNAI_6	29.52	61.87	32.35
050718_arx2rnai_ins9nasi2_3	62.17	54.12	-8.05
050718_arx2rnai_ins9nasi2_5	54.39	44.13	-10.26
050718_arx2rnai_ins9nasi2_6	73.06	56.35	-16.71
050718_arx2rnai_ins9nasi2_7	67.91	47.84	-20.07
050718_arx2rnai_ins9nasi2_8	68.02	55.13	-12.89
050718_arx2rnai_ins9nasi2_9	49.74	47.43	-2.31
050718_arx2rnai_ins9nasi2_10	63.16	68.14	4.98
050718_arx2rnai_ins9nasi2_11	64.39	49.53	-14.86
050718_arx2rnai_ins9nasi2_12	44.53	59.21	14.68
050718_arx2rnai_ins9nasi2_13	61.73	45.63	-16.1
