# Supplementary material for: Stem cell niche exit in C. elegans via orientation and segregation of daughter cells by a cryptic cell outside the niche
Source: eLife. 2020 Jul 21;9:e56383. doi: 10.7554/eLife.56383 (PMC7467730; doi:10.7554/eLife.56383)
Supplement: Figure 7—source data 1. [file elife-56383-fig7-data1.xlsx]

## Sheet: Sheet1
folder	file	treatment	mitotic zone length	Sh1 position	difference	DTC	divs?	div positions			treatment	div positions	somatic			DTC l4440	DTC+Sh1 l4440	Sh1 l4440	Neither
weds48hrsL4start	w_2	L4440	43.22	30.64	12.58	90.91	2	16.082	dtc		L4440	9.252	dtc		0-9.99	4	0	0	0
								29.194	dtc		L4440	9.469	dtc		10-19.99	13	2	0	0
	w_3	L4440	45.85	57.98	-12.13	104.45	3	9.789	dtc		L4440	9.711	dtc		20-29.99	14	4	0	0
								9.469	dtc		L4440	9.789	dtc		30-39.99	5	4	0	0
								27.427	dtc		L4440	11.88	dtc		40-49.99	4	4	0	0
	w_4	L4440	66.12	25.69	40.43	128.39	3	21.262	dtc-Sh1		L4440	13.329	dtc		50-59.99	5	8	0	0
								29.876	DTC-Sh1		L4440	13.496	dtc		60-69.99	1	0	1	0
								13.843	dtc-Sh1		L4440	13.878	dtc		70-79.99	0	1	0	0
	w_5	L4440	78.94	50.32	28.62	82.08	0				L4440	14.388	dtc			46	23	1	0
	w_6	L4440	72.37	31.71	40.66	68.83	2	57.183	dtc-sh1		L4440	14.831	dtc			DTC unc60	DTC+Sh1 unc60	Sh1 unc60
								60.515	sh1		L4440	15.374	dtc		0-9.99	5	0	0	0
	w_7	L4440	59.05	56.92	2.13	96.15	3	17.204	DTC		L4440	16.082	dtc		10-19.99	9	0	0	0
								33.42	DTC		L4440	16.89	dtc		20-29.99	12	0	0	0
								34.623	dtc		L4440	17.204	DTC		30-39.99	7	0	0	0
	w_8	L4440	50.21	15.78	34.43	45.02	1	14.524	DTC-sh1		L4440	17.576	dtc		40-49.99	2	1	0	0
	w_9	L4440	67.94	42.32	25.62	92.56	2	11.88	dtc		L4440	17.909	dtc		50-59.99	2	2	4	0
								57.364	dtc-sh1		L4440	19.419	dtc		60-69.99	1	2	1	0
	w_10	L4440	52.16	34.48	17.68	52.75	4	13.878	dtc		L4440	20.876	dtc		70-79.99	0	0	0	0
								19.419	dtc		L4440	21.344	dtc			38	5	5	0
								25.49	dtc		L4440	21.964	dtc
								27.993	dtc		L4440	22.682	dtc
	w_11	L4440	79.61	23.99	55.62	88.46	2	17.909	dtc		L4440	22.841	dtc
								14.388	dtc		L4440	23.086	dtc		ratios	DTC	DTC+Sh1	Sh1
	w_12	L4440	86.66	65.74	20.92	114.4	1	39.041	dtc-Sh1		L4440	24.584	dtc		L4440	1.76923	0.884615	0.0384615
	w_13	L4440	79.11	53.65	25.46	94.49	1	46.828	dtc-sh1		L4440	25.49	dtc		unc60	1.80952	0.238095	0.238095
	w_1	unc60	71.59	120.2	-48.61	111.41	0				L4440	26.446	dtc
	w_2	unc60	55.73	33.84	21.89	93.67	0				L4440	27.427	dtc
	w_3	unc60	67.98	67.78	0.2	75.83	1	20.746	dtc		L4440	27.993	dtc
	w_4	unc60	77.22	49.89	27.33	89.39	0				L4440	29.194	dtc
	w_5	unc60	60.08	67.23	-7.15	76.2	0				L4440	29.256	dtc
	w_6	unc60	79.38	57.44	21.94	96.02	0				L4440	29.875	dtc
	w_7	unc60	77.2	96.76	-19.56	84.31	0				L4440	33.42	DTC
	w_8	unc60	62.39	66.62	-4.23	115.28	0				L4440	33.66	dtc
	w_10	unc60	59.24	88.8	-29.56	96.26	1	28.35	dtc		L4440	34.623	dtc
	w_11	unc60	71.75	60.45	11.3	101.19	0				L4440	34.921	dtc
	w_12	unc60	78.2	67.19	11.01	70.06	3	35.396	dtc		L4440	37.949	dtc
								21.808	dtc		L4440	40.384	dtc
								13.899	dtc		L4440	41.27	dtc
thurs48hrsL4start	t_1	unc60	67.64	40.31	27.33	69.61	2	15.339	dtc		L4440	42.537	dtc
								8.364	dtc		L4440	43.616	dtc
	t_2	unc60	77.12	91.49	-14.37	76.26	1	46.786	dtc		L4440	50.121	DTC
	t_3	unc60	72.99	73.69	-0.7	74.17	3	36.193	dtc		L4440	51.341	dtc
								34.651	dtc		L4440	53.668	dtc
								39.405	dtc		L4440	56.07	dtc
	t_4	unc60	55.6	59.71	-4.11	85.27	0				L4440	57.652	dtc
	t_5	unc60	82.8	63.98	18.82	77.45	2	50.566	sh1		L4440	66.177	dtc
								59.533	sh1		L4440	13.843	dtc-Sh1
	t_6	unc60	84.63	128.16	-43.53	83.18	3	29.148	dtc		L4440	14.524	DTC-sh1
								22.003	dtc		L4440	21.262	dtc-Sh1
								18.927	dtc		L4440	27.461	DTC-sh1
	t_7	unc60	72.35	129.61	-57.26	154.4	0				L4440	27.842	DTC-sh1
	t_8	unc60	68.73	78.57	-9.84	80.17	0				L4440	29.876	DTC-Sh1
	t_10	unc60	69.96	108.8	-38.84	150.21	0				L4440	34.816	dtc-sh1
	t_11	unc60	65.4	67.4	-2	77.8	6	34.488	DTC		L4440	35.655	DTC-sh1
								49.356	dtc		L4440	39.04	DTC-sh1
								55.108	dtc		L4440	39.041	dtc-Sh1
								18.336	dtc		L4440	39.126	dtc-Sh1
								11.393	dtc		L4440	43.602	dtc-Sh1
								22.203	dtc		L4440	43.847	dtc-Sh1
	t_1	L4440	81.62	21.72	59.9	130.15	2	54.142	DTC-sh1		L4440	46.828	dtc-sh1
								21.964	dtc		L4440	47.434	dtc-sh1
	t_2	L4440	80.37	45.9	34.47	112.22	2	57.88	dtc-Sh1		L4440	53.523	dtc-sh1
								29.875	dtc		L4440	54.142	DTC-sh1
	t_3	L4440	86.59	56.08	30.51	96.39	5	57.652	dtc		L4440	54.271	DTC-Sh1
								41.27	dtc		L4440	54.347	dtc-sh1
								26.446	dtc		L4440	55.305	DTC-sh1
								14.831	dtc		L4440	57.183	dtc-sh1
								40.384	dtc		L4440	57.364	dtc-sh1
	t_4	L4440	61.62	18.46	43.16	80.83	4	29.256	dtc		L4440	57.88	dtc-Sh1
								23.086	dtc		L4440	70.594	DTC-sh1
								43.847	dtc-Sh1		L4440	60.515	sh1
								34.816	dtc-sh1
	t_5	L4440	69.67	58.93	10.74	95.36	3	13.496	dtc
								37.949	dtc
								24.584	dtc
	t_6	L4440	82.01	43.93	38.08	60.35	4	47.434	dtc-sh1
								16.89	dtc		unc60	1.454	dtc
								21.344	dtc		unc60	4.987	dtc
								33.66	dtc		unc60	6.914	dtc
	t_7	L4440	73.06	14.93	58.13	152.09	0				unc60	7.484	dtc
	t_8	L4440	87.67	32.36	55.31	119.57	1	50.121	DTC		unc60	8.364	dtc
	t_9	L4440	79.71	37.03	42.68	64.68	2	54.271	DTC-Sh1		unc60	11.245	dtc
								13.329	dtc		unc60	11.393	dtc
Fri_48hrsstart	f_1	unc60	98.17	49.85	48.32	104.87	1	60.633	sh1		unc60	13.899	dtc
	f_2	unc60	83.57	124.7	-41.13	105.34	2	31.207	DTC		unc60	15.339	dtc
								28.674	DTC		unc60	15.38	dtc
	f_3	unc60	79.58	84.36	-4.78	104.71	3	29.762	dtc		unc60	16.949	dtc
								22.33	dtc		unc60	17.249	dtc
								51.274	dtc		unc60	18.336	dtc
	f_5	unc60	101.87	79.6	22.27	84.96	1	1.454	dtc		unc60	18.927	dtc
	f_6	unc60	86.7	118.12	-31.42	64.33	2	62.607	dtc-sh1		unc60	20.746	dtc
								67.631	dtc-Sh1		unc60	21.808	dtc
	f_7	unc60	92.36	85.05	7.31	70.86	3	39.921	dtc		unc60	22.003	dtc
								25.935	dtc		unc60	22.203	dtc
								42.949	dtc-sh1		unc60	22.33	dtc
	f_8	unc60	25.08	22.86	2.22	56.8	0				unc60	25.035	dtc
	f_9	unc60	75.96	105.78	-29.82	108.76	1	64.096	dtc		unc60	25.935	dtc
	f_10	unc60	69.08	107.51	-38.43	78.54	2	55.308	sh1		unc60	26.875	dtc
								59.905	sh1		unc60	28.35	dtc
	f_11	unc60	82.62	81.32	1.3	122.02	2	59.679	dtc-sh1		unc60	28.674	DTC
								58.729	dtc-Sh1		unc60	29.148	dtc
	f_12	unc60	81.75	99.49	-17.74	65.88	2	25.035	dtc		unc60	29.762	dtc
								4.987	dtc		unc60	31.207	DTC
	f_13	unc60	87.91	111.91	-24	96.17	0				unc60	34.488	DTC
	f_14	unc60	93.14	150.18	-57.04	125.21	5	6.914	dtc		unc60	34.651	dtc
								7.484	dtc		unc60	35.396	dtc
								11.245	dtc		unc60	36.193	dtc
								17.249	dtc		unc60	39.405	dtc
								26.875	dtc		unc60	39.921	dtc
	f_15	unc60	85.05	106.85	-21.8	134.23	2	15.38	dtc		unc60	46.786	dtc
								16.949	dtc		unc60	49.356	dtc
	f_2	L4440	68.58	39.01	29.57	110.92	0				unc60	51.274	dtc
	f_3	L4440	110.33	38.92	71.41	59.21	1	70.594	DTC-sh1		unc60	55.108	dtc
	f_4	L4440	81.02	67.87	13.15	102.48	0				unc60	64.096	dtc
	f_5	L4440	67.7	26.88	40.82	82.87	5	27.842	DTC-sh1		unc60	42.949	dtc-sh1
								27.461	DTC-sh1		unc60	58.729	dtc-Sh1
								17.576	dtc		unc60	59.679	dtc-sh1
								22.841	dtc		unc60	62.607	dtc-sh1
								9.711	dtc		unc60	67.631	dtc-Sh1
	f_8	L4440	94.17	106.81	-12.64	163.8	1	66.177	dtc		unc60	50.566	sh1
	f_9	L4440	76.78	74.56	2.22	83.84	1	34.921	dtc		unc60	55.308	sh1
	f_10	L4440	70.34	31.42	38.92	76.74	5	39.126	dtc-Sh1		unc60	59.533	sh1
								43.602	dtc-Sh1		unc60	59.905	sh1
								15.374	dtc		unc60	60.633	sh1
								20.876	dtc
								35.655	DTC-sh1
	f_12	L4440	67.79	64.84	2.95	103.78	0
	f_14	L4440	72.39	54.69	17.7	98.44	8	55.305	DTC-sh1
								53.523	dtc-sh1
								39.04	DTC-sh1
								22.682	dtc
								9.252	dtc
								43.616	dtc
								54.347	dtc-sh1
								53.668	dtc
	f_15	L4440	85.26	57.18	28.08	68.21	3	51.341	dtc		Animals with active cell divisions	Total animals
								56.07	dtc	Control	26	31
								42.537	dtc	unc-60 RNAi	21	35
						Divs per animal
						UNC60AVG	1.37143
						L4440AVG	2.29032
					0 div	w div	total animals	total divs	%w div
				L4440	5	26	31	71	0.83871	2.73077
				UNC60	14	21	35	48	0.6	2.28571
