# Supplementary material for: Stem cell niche exit in C. elegans via orientation and segregation of daughter cells by a cryptic cell outside the niche
Source: eLife. 2020 Jul 21;9:e56383. doi: 10.7554/eLife.56383 (PMC7467730; doi:10.7554/eLife.56383)
Supplement: Figure 7—source data 2. [file elife-56383-fig7-data2.xlsx]

## Sheet: Sheet1
Folder	File	Treatment	Sh1 distance	GLD-1::GFP
2020_01_24	RNAi_1	RNAi	81.89	32.91
unc60_48hrspostL4	RNAi_2	RNAi	84.47	51.16
	RNAi_3	RNAi	83.87	38.49
	RNAi_4	RNAi	72.67	35.92
	RNAi_5	RNAi	55.47	42.86
	RNAi_6	RNAi	119.69	52.4
	RNAi_7	RNAi	71.21	43.7
	RNAi_10	RNAi	53.39	33.24
	RNAi_11	RNAi	73.66	41.55
	RNAi_12	RNAi	81.95	43.3
	RNAi_13	RNAi	112.77	43.55
	RNAi_14	RNAi	150.94	45.12
	RNAi_15	RNAi	52.01	38.99
	RNAi_18	RNAi	47.35	49.29
	RNAi_19	RNAi	36.94	34.41
	RNAi_20	RNAi	63.31	40.13
	RNAi_23	RNAi	38.81	37.02
	RNAi_24	RNAi	60.4	34.5
	RNAi_25	RNAi	53.93	40.64
control_45hrspostL4	control_2	control	48.37	33.21
	control_3	control	54.73	29.61
	control_4	control	16.13	42.36
	control_5	control	29.03	26.92
	control_6	control	21.41	39.4
	control_8	control	29.46	29.9
	control_9	control	66.62	39.37
	control_10	control	55.39	36.82
	control_13	control	37.39	29.34
	control_15	control	19.25	35.6
	contro;_16	control	74.76	46.26
	control_18	control	57.79	33.85
	control_19	control	34.23	33.32
	control_20	control	40.66	21.06
	control_22	control	22.94	28.14
	contro_26	control	24.91	22.5
