# Supplementary material for: Stem cell niche exit in C. elegans via orientation and segregation of daughter cells by a cryptic cell outside the niche
Source: eLife journal article supplement (doi:10.7554/elife.56383), 2020-07-21

**A** *mKate::inx-8(qy78); inx-9(ok1502)* *inx-9* loss of function mutant

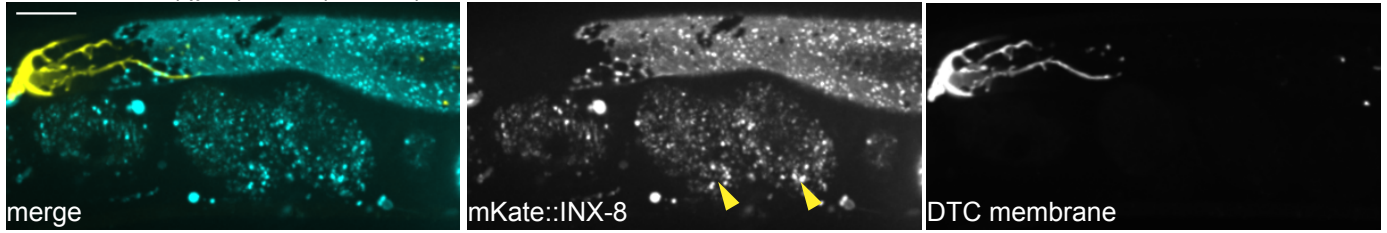

**B** *ina-1::mNG*

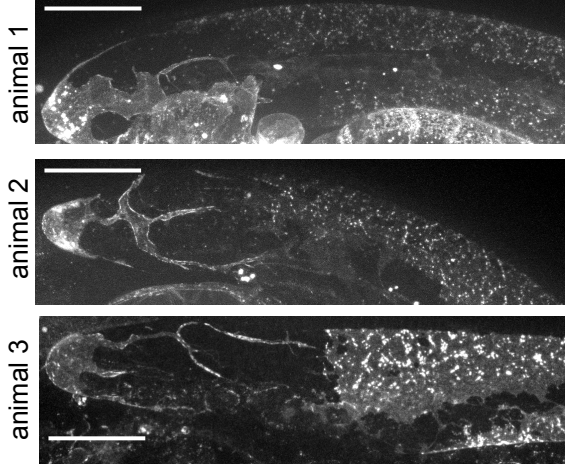

**C** *lim-7p::GFP; mKate::inx-8; lag-2p::mNG::PH*

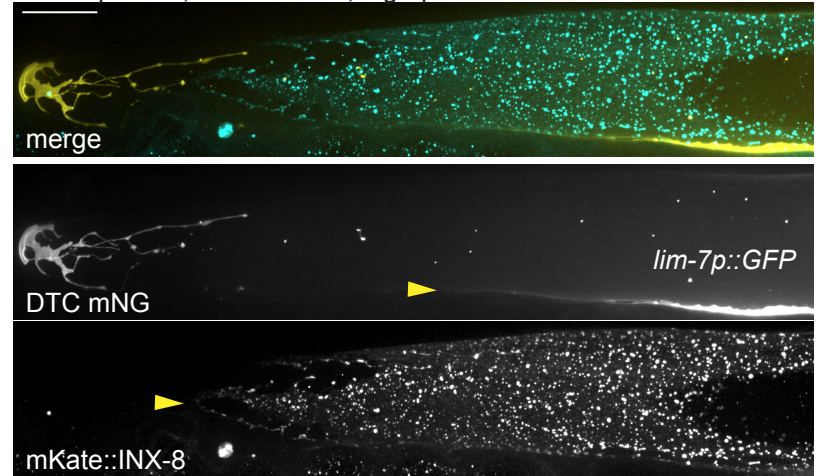

**D** 15  $\mu$ M projection DTC membrane mKate::INX-8 Superficial 5 $\mu$ M projection

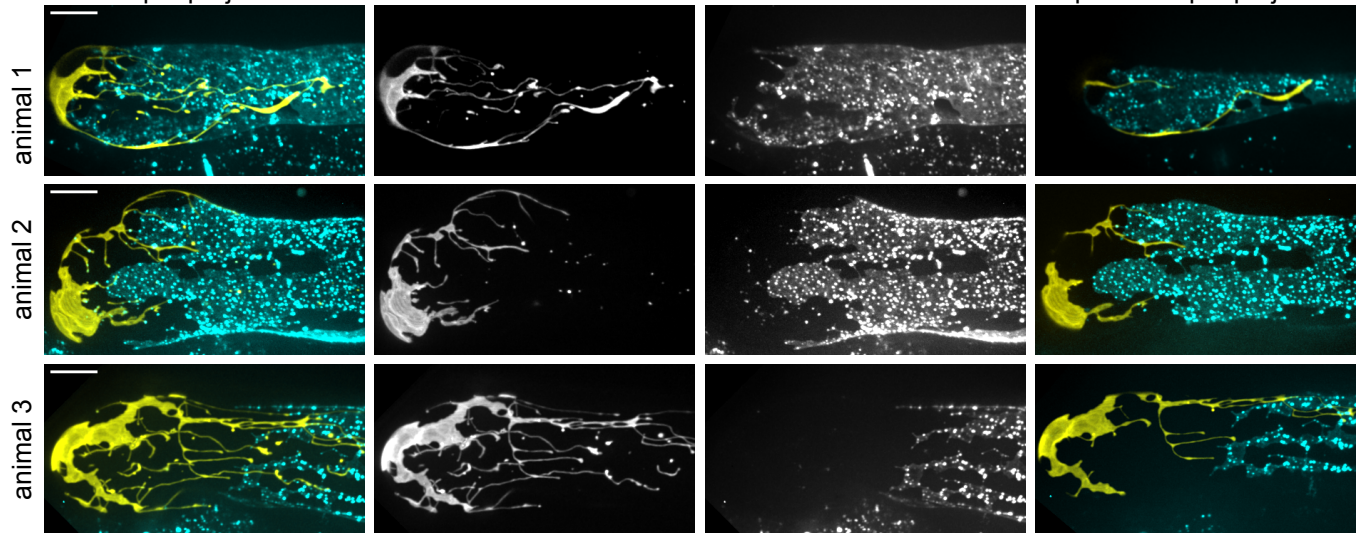

**E** 15  $\mu$ M projection DTC membrane GFP::INX-9 Superficial 5 $\mu$ M projection

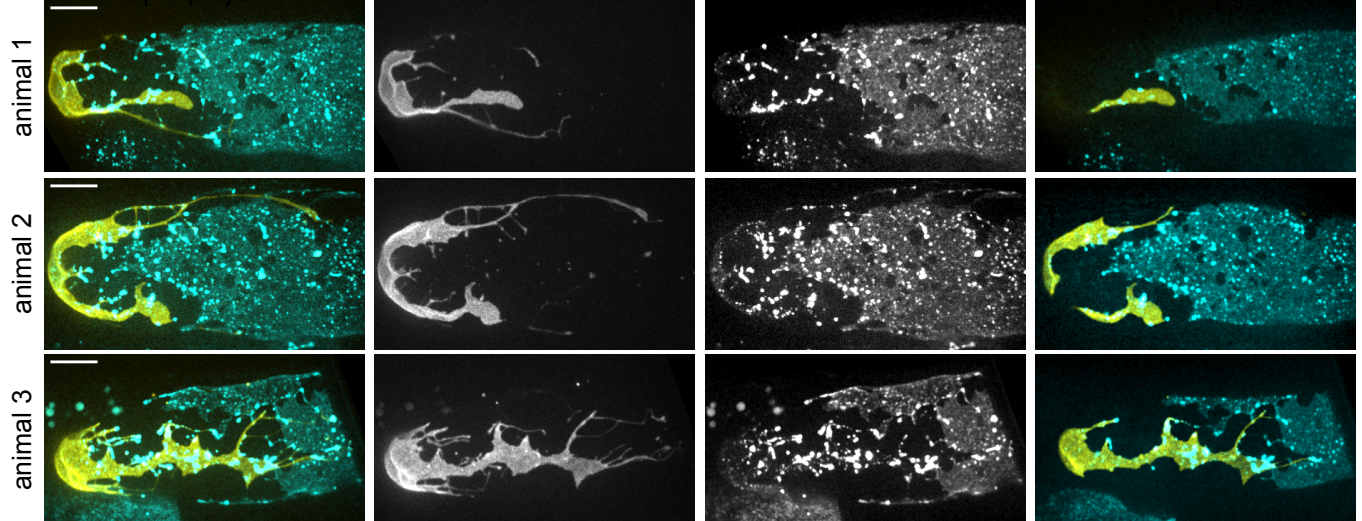

Supplement: supp [file elife_poa_e56383_Figure_1_figure_supplement_1.pdf › elife_poa_e56383_Figure_1_figure_supplement_1.pdf]
