# Supplementary figures and images for: Stem cell niche exit in C. elegans via orientation and segregation of daughter cells by a cryptic cell outside the niche
Source: eLife journal article supplement (doi:10.7554/elife.56383), 2020-07-21

Figure S2

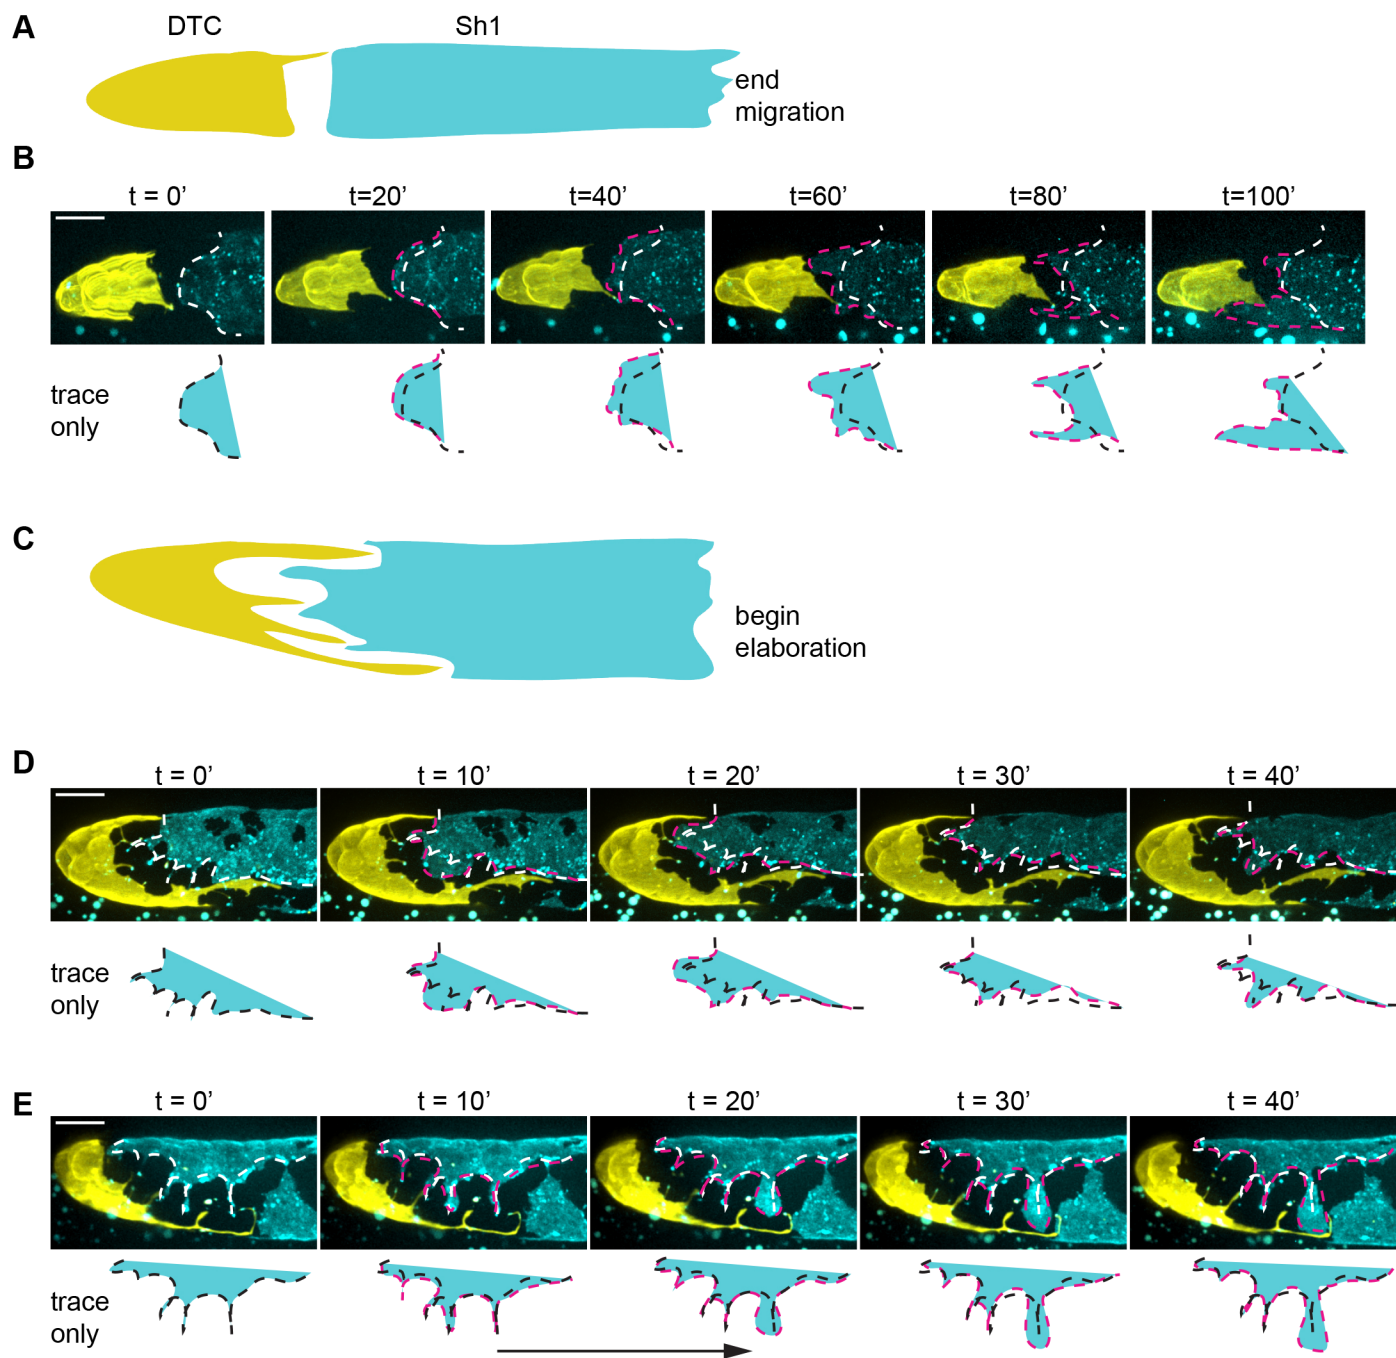

Supplement: supp [file elife_poa_e56383_Figure_2_figure_supplement_1.pdf › elife_poa_e56383_Figure_2_figure_supplement_1.pdf]

Figure S3

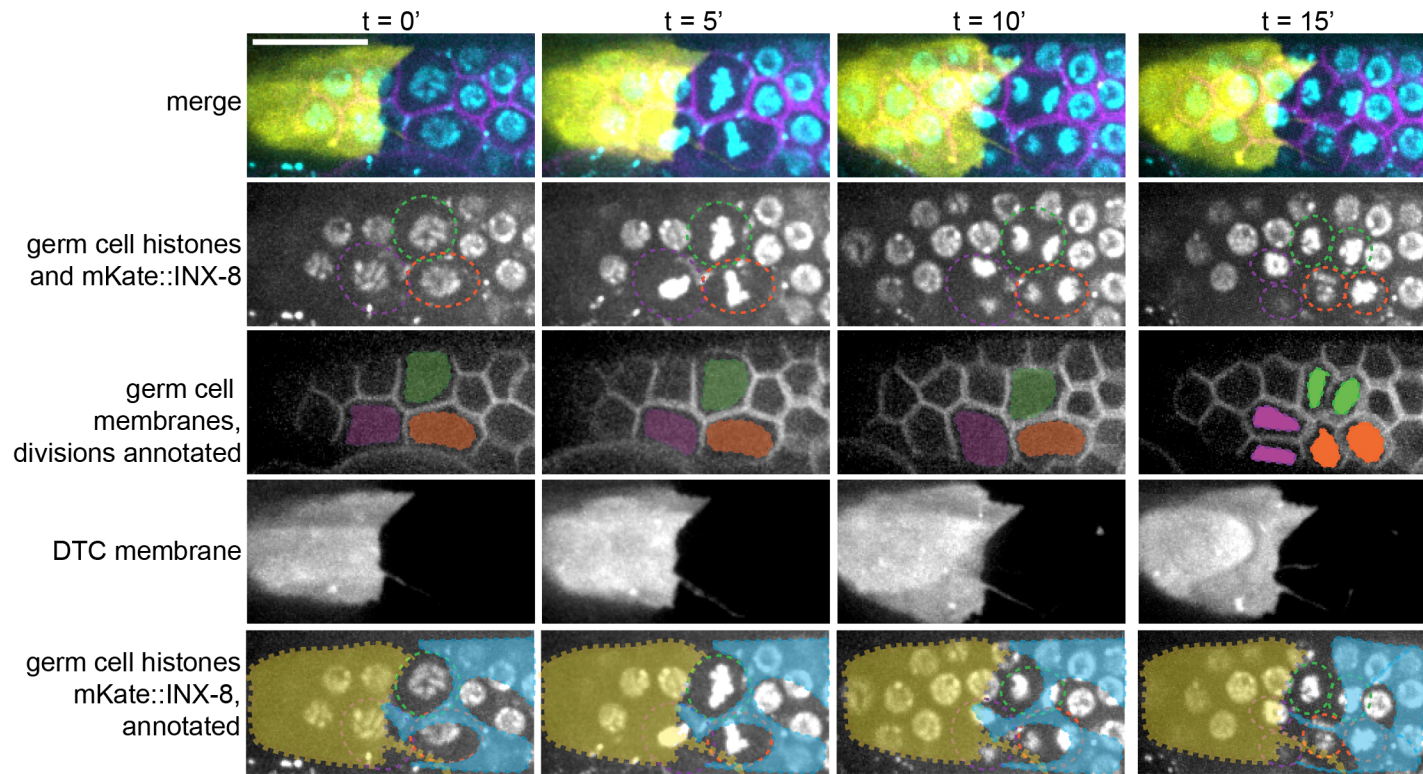

Supplement: supp [file elife_poa_e56383_Figure_3_figure_supplement_1.pdf › elife_poa_e56383_Figure_3_figure_supplement_1.pdf]

Figure S4

**A**

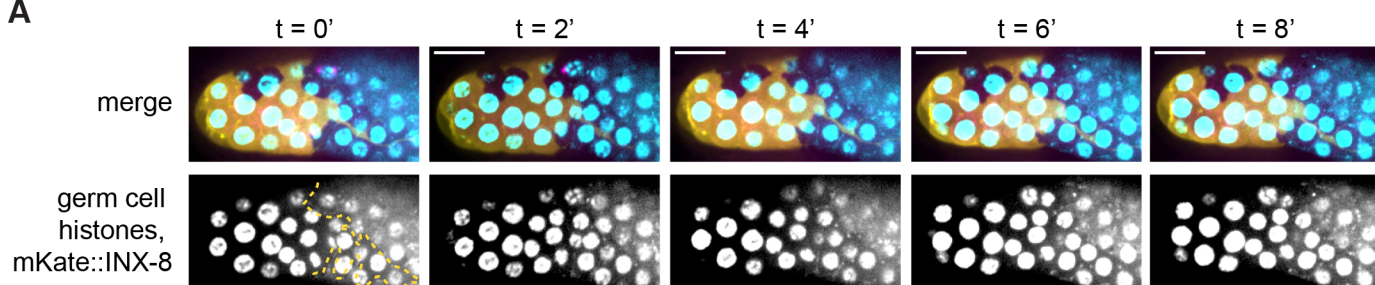

**B**

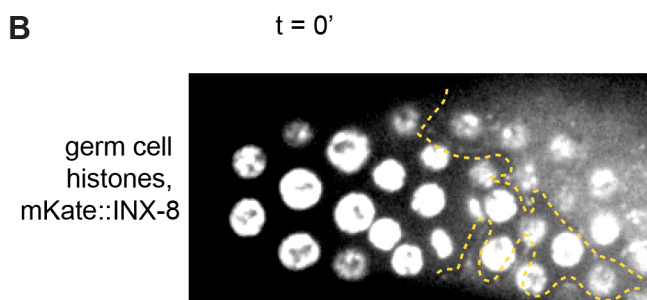

**C**

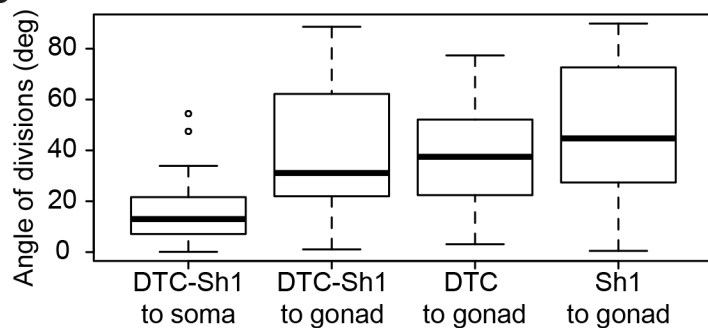

**D**

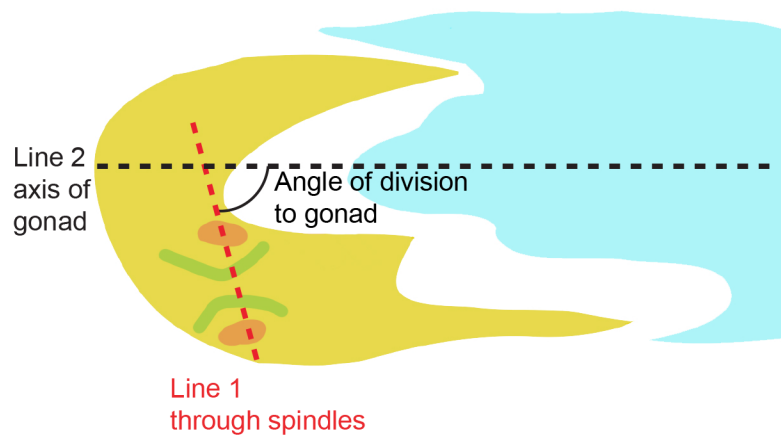

**F**

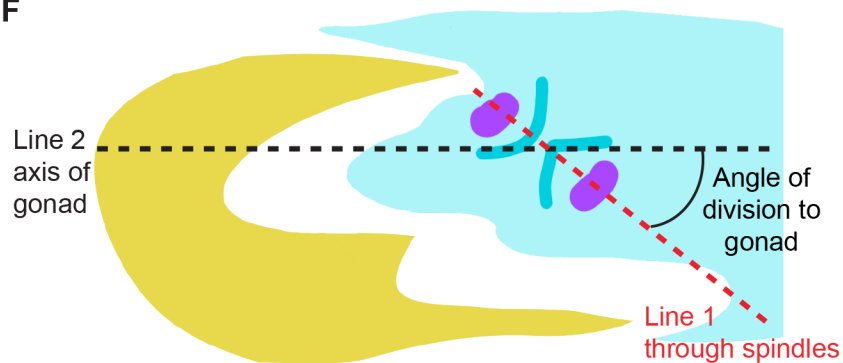

**E**

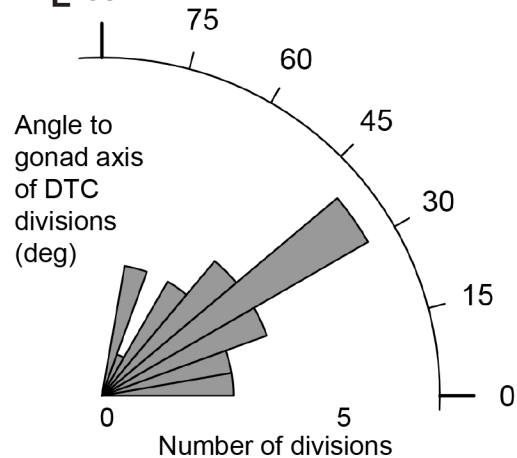

**G**

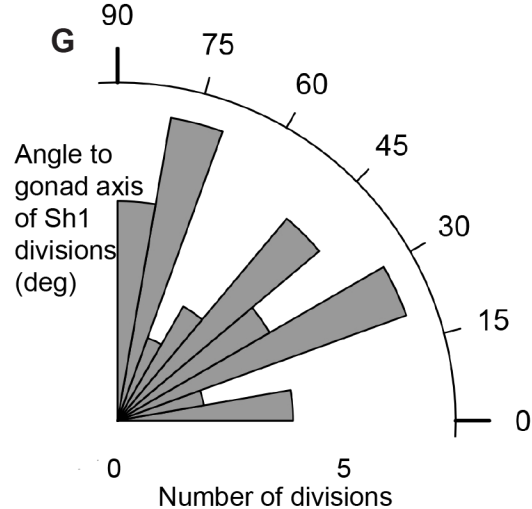

Supplement: supp [file elife_poa_e56383_Figure_5_figure_supplement_1.pdf › elife_poa_e56383_Figure_5_figure_supplement_1.pdf]

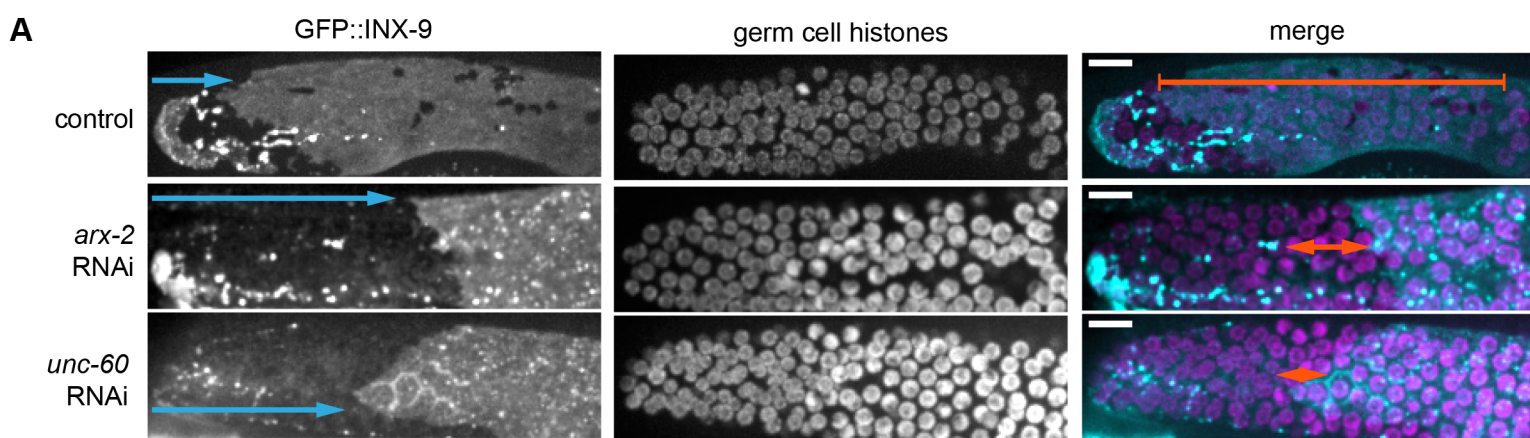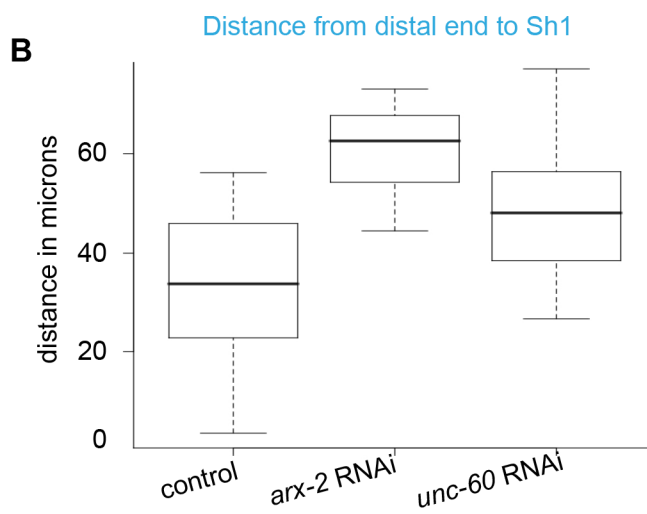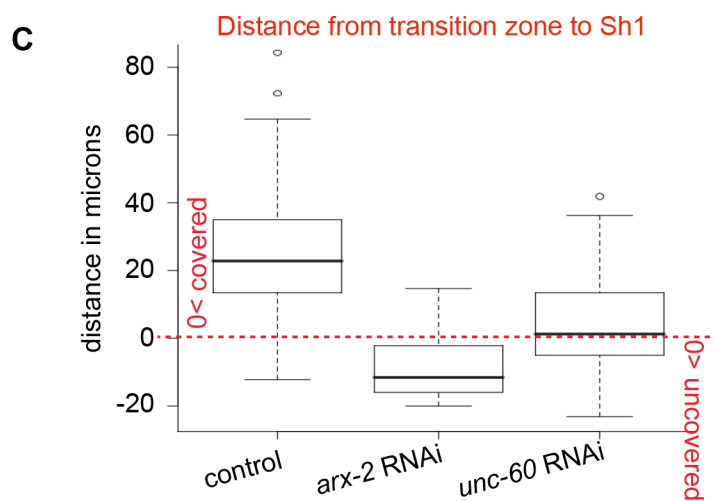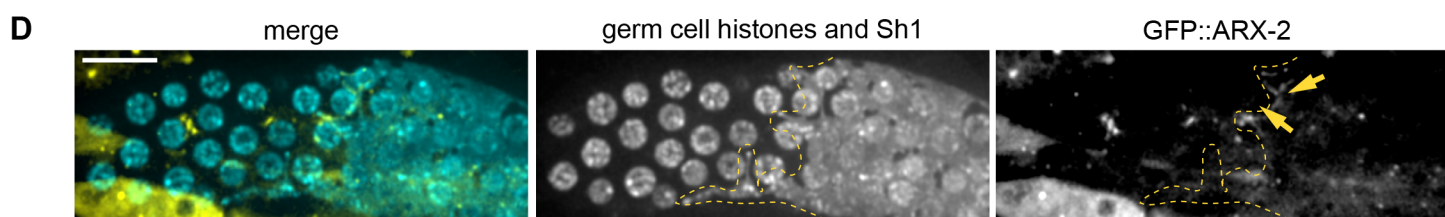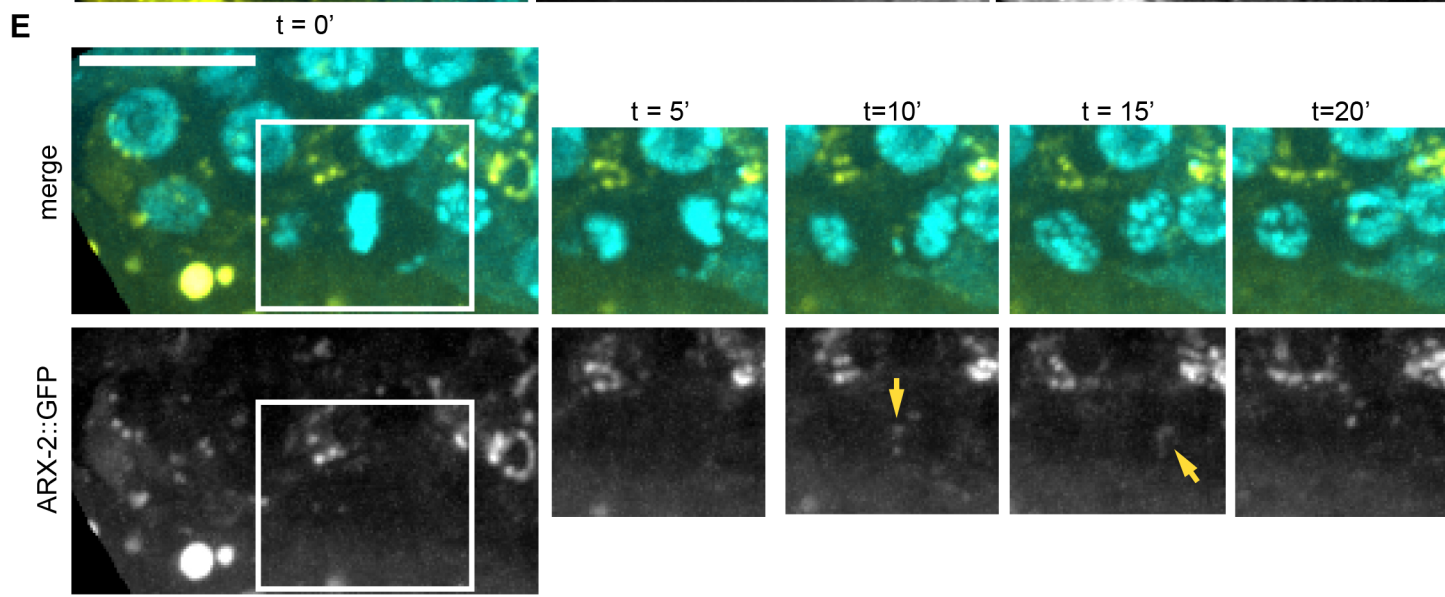

Supplement: supp [file elife_poa_e56383_Figure_6_figure_supplement_1.pdf › elife_poa_e56383_Figure_6_figure_supplement_1.pdf]
